# Supplementary material for: Synthesis of Gd/N co-doped ZnO for enhanced UV-vis and direct solar-light-driven photocatalytic degradation
Source: Royal Society of Chemistry journal article supplement (doi:10.1039/d0ra10698d), 2021-01-01
Supplement: d0ra10698d1.pdf [file d0ra10698d1.pdf]

## **Supporting Information**

### **Synthesis of Gd/N co-doped ZnO for enhanced UV-vis and direct solar- light-driven photocatalytic degradation**

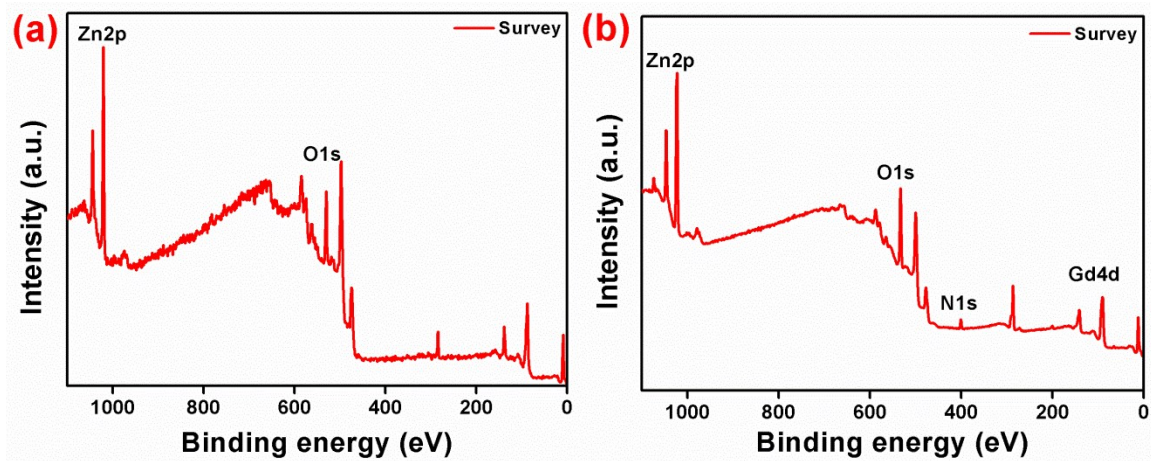

Figure S1. XPS survey spectrum (a) Pure ZnO and (b) Gd/N/ZnO

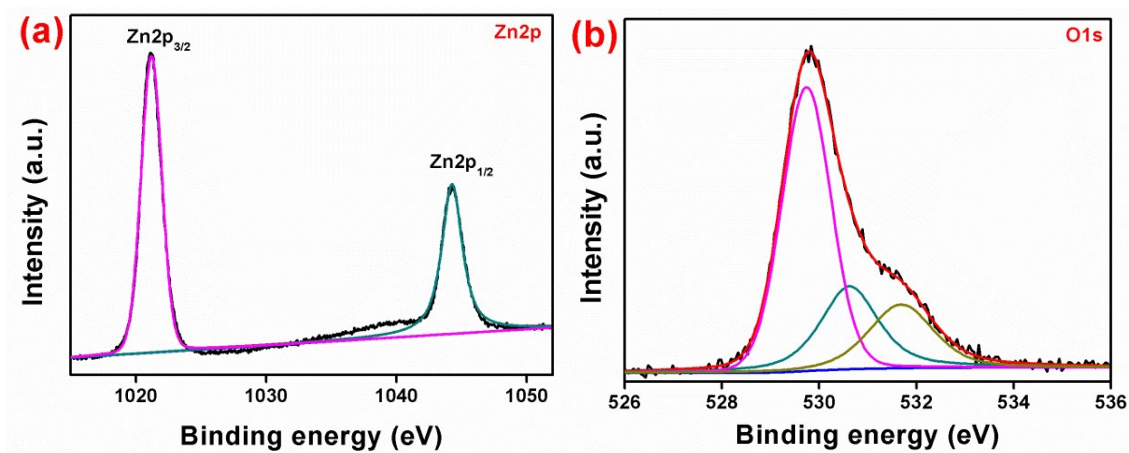

Figure S2. High resolution XPS spectrum of pure ZnO (a) Zn2p and (b) O1s

| <b>S.No</b> | <b>Elements</b> | <b>Atomic%</b> |
|-------------|-----------------|----------------|
| <b>1</b>    | Zinc (Zn)       | <b>25.74</b>   |
| <b>2</b>    | Gadolinium (Gd) | <b>4.14</b>    |
| <b>3</b>    | Nitrogen (N)    | <b>10.34</b>   |
| <b>4</b>    | Oxygen (O)      | <b>59.78</b>   |

Table 1. Atomic % of elements presented in the Gd/N/ZnO nanoparticle using XPS analysis.
